# Supplementary material for: Harnessing RNA sequencing for global, unbiased evaluation of two new adjuvants for dendritic-cell immunotherapy
Source: PubMed Central journal article supplement (PMC5386730; doi:10.18632/oncotarget.15190), 2017-02-08
Supplement: oncotarget-08-19879-s001.pdf [file oncotarget-08-19879-s001.pdf]

## Harnessing RNA sequencing for global, unbiased evaluation of two new adjuvants for dendritic-cell immunotherapy

### SUPPLEMENTARY FIGURE

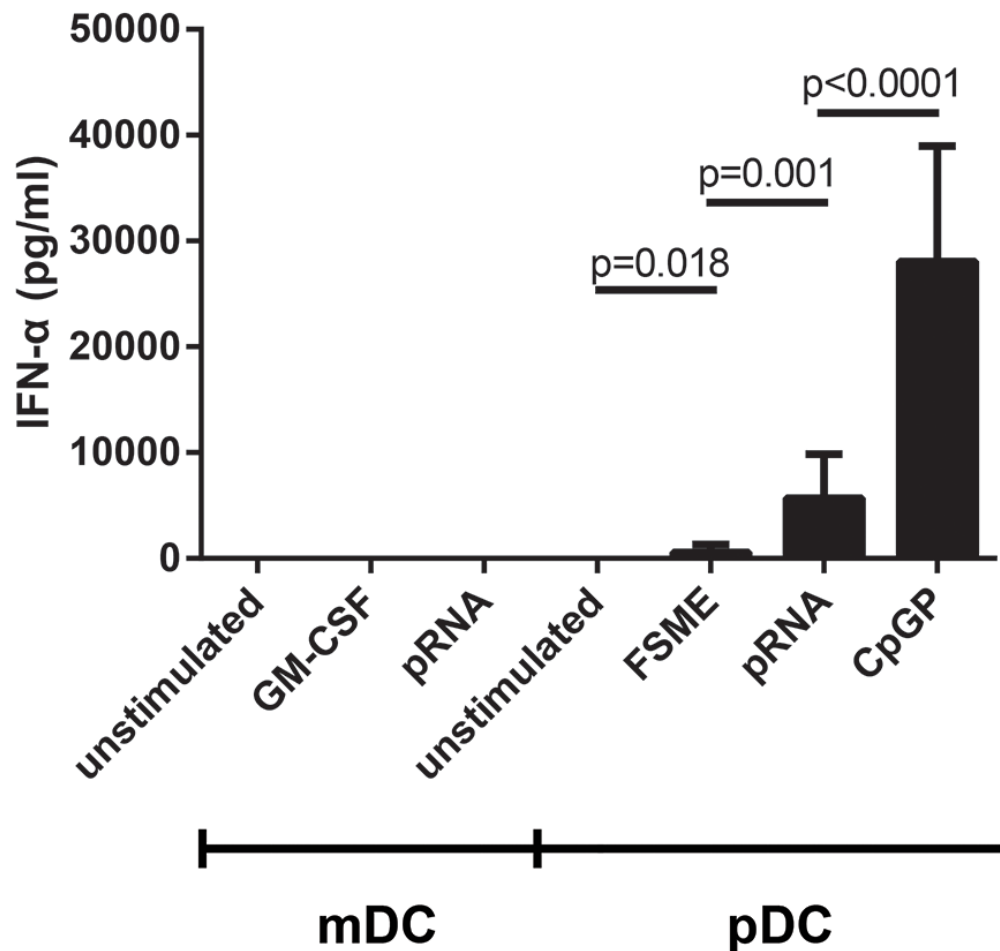

Supplementary Figure 1: High type I interferon production of pDCs upon CpG-P stimulation. A. Type I interferon release on protein level as measured in the supernatant of DCs after overnight incubation with the indicated stimuli (n=7).
